## RESEARCH ARTICLE

# Evaluation of clinical and laboratory findings in MIS-C patients associated with COVID-19: An experience from the Northwest of Iran

Mina Farshidgozar<sup>1</sup>, Sonia Oveisi<sup>1</sup>, Samira Dodangeh<sup>1</sup>, Fatemeh Fawzi<sup>2</sup>, Faezeh Maleki Sanjani<sup>3</sup>, Alireza Razzaghi<sup>4</sup>, Hossein Teimouri<sup>5\*</sup>, Gerson Nakazato<sup>6</sup>

**1** Clinical Research Development Unit of Advanced Medicine, Qazvin University of Medical Sciences, Qazvin, Iran, **2** Student Research Committee, Qazvin University of Medical Sciences, Qazvin, Iran, **3** Research Institute for Prevention of Non-Communicable Diseases, Children Growth Research Center, Qazvin University of Medical Sciences, Qazvin, Iran, **4** Research Institute for Prevention of Non-Communicable Diseases, Social Determinants of Health Research Center, Qazvin University of Medical Sciences, Qazvin, Iran, **5** Medical Microbiology Research Center, Qazvin University of Medical Sciences, Qazvin, Iran, **6** Department of Microbiology, Laboratory of Basic and Applied Bacteriology, Center of Biological Sciences, State University of Londrina, Londrina, Brazil

\* [Hosseinteimouri94@gmail.com](mailto:Hosseinteimouri94@gmail.com)

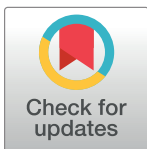

## OPEN ACCESS

**Citation:** Farshidgozar M, Oveisi S, Dodangeh S, Fawzi F, Maleki Sanjani F, Razzaghi A, et al. (2024) Evaluation of clinical and laboratory findings in MIS-C patients associated with COVID-19: An experience from the Northwest of Iran. *PLoS ONE* 19(11): e0313843. <https://doi.org/10.1371/journal.pone.0313843>

**Editor:** Benjamin M. Liu, Children's National Hospital, George Washington University, UNITED STATES OF AMERICA

**Received:** May 23, 2024

**Accepted:** November 1, 2024

**Published:** November 21, 2024

**Copyright:** © 2024 Farshidgozar et al. This is an open access article distributed under the terms of the [Creative Commons Attribution License](https://creativecommons.org/licenses/by/4.0/), which permits unrestricted use, distribution, and reproduction in any medium, provided the original author and source are credited.

**Data Availability Statement:** All relevant data are within the manuscript and its [Supporting Information](#) files.

**Funding:** The author(s) received no specific funding for this work.

**Competing interests:** The authors have declared that no competing interests exist.

## Abstract

This study aimed to evaluate the range of clinical and laboratory findings of multisystem inflammatory syndrome in children (MIS-C) with COVID-19 in a tertiary children's hospital in Northwest Iran during 2020–2022. According to the CDC guidelines, this cross-sectional study included 300 pediatric patients diagnosed with MIS-C. Data were collected retrospectively from medical records, focusing on symptoms, organ involvement, laboratory findings, and outcomes. Statistical analysis was performed using SPSS software, with significance set at p-values <0.05. The study population had a median age of 3 years, with a slight male predominance (57.3%). The most affected systems in MIS-C disease were hematological (87%), gastrointestinal (85%), and respiratory (67%). Laboratory analysis highlighted elevated inflammatory markers such as D-dimer (83.3%), ferritin (71.4%), and CRP (49.7%). Abnormal urinalysis was observed in 151 patients (50.3%), with glucosuria in 83 cases (27.7%) and proteinuria in 29 cases (9.7%). The study found a significant correlation between cardiovascular issues and elevated blood platelets, ESR, CRP, and troponin levels ( $P \leq 0.01$ ) but not with ferritin, albumin, or D-dimer levels. Also, the examination of disease outcomes in this study revealed that 81.7% of MIS-C patients were isolated during their hospital stay, 18.3% needed ICU care, and 1% died in hospital. We have presented an experience with distinct clinical and laboratory manifestations in MIS-C. Given the lower median age in this study compared to previous studies, reporting clinical and laboratory manifestations of MIS-C in pediatrics with a younger age is valuable for the diagnosis and treatment course. Some laboratory factors were risk factors for cardiovascular involvement, and consequently, echocardiography is recommended in MIS-C patients with these laboratory indications. Given the lack of a specific diagnostic test for this emerging disease, studies focusing on investigating clinical symptoms and findings are valuable.

## Introduction

Since December 2019, the global outbreak of Coronavirus disease-2019 (COVID-19), which is caused by the severe acute respiratory syndrome coronavirus 2 (SARS-CoV-2), has unfolded worldwide [1–3]. Although data gathered during the initial stages of the epidemic showed that fever, dry cough, fatigue, and myalgia were the predominant symptoms of COVID-19, more serious complications such as acute respiratory distress syndrome (ARDS) and even significant mortality were seen in patients [4]. Underlying conditions, such as cardiovascular diseases, have been identified as significant risk factors for increased severity and poorer prognosis in COVID-19 patients [5]. Furthermore, clinical markers, including elevated cytokine levels of IL-6 and IL-8, function as biomarkers signifying a poor prognosis. Conditions such as primary immunodeficiency and cytokine storms significantly heighten the risk and severity of COVID-19 complications [6].

Recent studies have highlighted that children, similar to adults, can experience significant long-term effects from COVID-19. Pediatric Long COVID-19 can lead to substantial disabilities, even in previously healthy children, and encompasses a range of symptoms from mild to severe infections [7]. During the apex of the COVID-19 pandemic, hundreds of children and adolescents developed Kawasaki disease (KD)-like symptoms such as fever, conjunctivitis, peripheral edema, and gastrointestinal issues like diarrhea, vomiting, and abdominal pain in Europe and the United States in the spring of 2020, and a few of them died from this disease [8]. In these patients, inflammatory indicators (erythrocyte sedimentation rate [ESR], C-reactive protein [CRP], procalcitonin, ferritin, interleukins [ILs], etc.) and neutrophils were also significantly increased [9]. Similar cases subsequently appeared worldwide, and this potentially life-threatening condition was named multisystem inflammatory syndrome in children (MIS-C) by the Centers for Disease Control and Prevention (CDC) and the World Health Organization (WHO) [10]. The disease usually begins 2–4 weeks after SARS-CoV-2 infection in children 6 months to 17 years of age [11]. This syndrome is of particular concern because most cases have been reported in children with no underlying health conditions [12]. This unexpected presentation in previously healthy children challenges current understanding and highlights the unpredictable nature of SARS-CoV-2, which can lead to severe complications even in those without prior health issues [13]. Therefore, it is crucial to develop effective diagnostic and treatment strategies to manage this condition in a population previously thought to be at lower risk.

Diagnosis of MIS-C cases is based on six main elements, including clinical features and laboratory findings [14], as follows: 1) age of children, 2) persistence of fever, 3) elevated inflammatory biomarkers, 4) symptoms and/or signs of organ dysfunction, 5) lack of an acceptable alternative diagnosis, and 6) evidence of COVID-19 or exposure to COVID-19. MIS-C may have shared features with KD, including mucocutaneous involvement, conjunctivitis, lymphadenopathy, and elevated inflammatory markers. Since MIS-C was identified, discussions about differentiating MIS-C from KD have continued among professionals worldwide [15,16].

Therefore, the geographic, genomic, and ethnic distribution of children with MIS-C should be considered to identify accurate diagnostic criteria and optimal treatment guidelines. More comprehensive studies are needed to enhance insight into MIS-C symptoms, treatments, outcomes, and preventive measures in children.

Considering the new nature of this disease and the lack of epidemiological investigation in Iran, we conducted this study to evaluate the range of clinical and laboratory symptoms of MIS-C in children with COVID-19 in a tertiary Children's Hospital during 2020–2022.

## Materials and methods

A cross-sectional study was carried out in an isolation unit and the Pediatric Intensive Care Unit (PICU) at Children's Hospital of Qazvin, Iran, from March 20, 2020, to March 20, 2022, using records of patients with MIS-C. Data were accessed for research purposes during the study period from October 15, 2022, to March 11, 2023.

The current investigation was carried out in accordance with the principles and recommendations outlined in the Helsinki Convention. Utmost confidentiality was maintained for all gathered information. The ethics committee of Qazvin University of Medical Sciences approved this project, assigning it the ethics code IR.QUMS.REC.1400.488.

Considering that the minimum prevalence of MIS-C in hospitalized children is 60% [17], the prevalence of 60% was considered in this study. The required sample size for this study was determined to be 266 patients based on the following formula.

$$N = \frac{z_{1-\frac{\alpha}{2}}^2 * P(1 - P)}{d^2} = 266$$

$$\alpha = 0.05, P = 0.6, q = 0.4, d = 0.06$$

The study's inclusion criteria encompassed patients with MIS-C who were hospitalized from 2020 to 2022. Furthermore, the patients were required to undergo a Reverse transcription polymerase chain reaction (RT-PCR) test, an antibody test, or an antigen test for SARS-CoV-2 within the first 48 hours of their admission to intensive care to confirm a current or recent infection. Exclusion criteria consisted of patients unable to receive a MIS-C diagnosis due to incomplete medical history, patients infected with COVID-19 but lacking fever with involvement of at least two body organs (thus not meeting the MIS-C definition), and patients meeting the MIS-C definition but having an underlying disease or concurrent infections (e.g., positive urine, stool, or sputum cultures for bacterial or fungal agents), leading to their exclusion from the study.

The diagnosis of MIS-C was determined based on the CDC health guidelines, which involved reviewing the medical records of individuals under the age of 21. These records were assessed for the presence of fever and the involvement of at least two organs, such as the heart, lungs, brain, skin, eyes, digestive system, or blood. Additionally, the patients' COVID-19 PCR test results, positive serological test, or history of contact with a positive individual within the past four weeks were also considered [8]. The instrument utilized in this investigation was a checklist comprising clinical and paraclinical manifestations that were assessed in individuals diagnosed with multisystem inflammatory syndrome.

## Statistical analysis

Data were analyzed using SPSS version 26 software. The Kolmogorov-Smirnov test was used to check the normality or non-normality of quantitative data distribution. The frequency and percentages for qualitative variables and the mean and standard deviation for quantitative variables with normal distribution were calculated. The chi-square test was used to check the relationship between qualitative variables. P-values <0.05 were considered significant. The raw data supporting this analysis are available in the [S1 File](#).

## Results

In the current study, the files of 300 patients fitting the definition of MIS-C were evaluated. The age range was from one month to 12 years, with a median age of 3 years. Of the patients, 42.7% were female (128 patients) and 57.3% were male (172 patients).

In this study, we also categorized the age stages into three groups: neonatal and infancy (from birth to 1 year), childhood (from 1 year to 10 years), and adolescence (from 10 years to 18 years). Of the patients, 168 (56%) belonged to the childhood age group, 96 (32%) were in the neonatal and infancy age group, and 36 (12%) were in the adolescence age group.

Also, 185 patients (61.7%) reported contact with a COVID-19-positive individual within four weeks before hospitalization. SARS-CoV-2 RT-PCR was positive in 17 patients (5.7%), while the rest (98 individuals, 32.6%) had both a positive contact history and positive SARS-CoV-2 RT-PCR results.

The findings related to organ involvement indicated that the hematological system was the most involved organ system, accounting for 87% of cases. This was followed by gastrointestinal involvement in 85% and respiratory involvement in 67% of patients. The related findings concerning organ involvement are presented in [Table 1](#) (definitions of organ involvement are provided in [S1 Table](#)). Also, the percentage of organ involvement across different age groups is shown in [Fig 1](#). Hematologic and gastrointestinal systems show consistently high involvement across all age groups. Except for respiratory involvement, which is higher during the neonatal and infancy stages compared to other age groups, the involvement of other organs increases during childhood and adolescence. A significant increase in endocrine involvement is observed in adolescence. Statistical significance is noted in respiratory, cardiovascular, and endocrine involvement with p-values of 0.047, 0.041, and 0.00026, respectively.

The most common gastrointestinal manifestation was nausea and vomiting, followed by diarrhea. The most common respiratory manifestations were cough and shortness of breath. A decrease in blood oxygen saturation was observed in 9 patients (3%).

The most frequent neurological involvement was seizures, seen in 61 patients (20.3%). Symptoms of increased intracranial pressure, such as double vision and cranial nerve VI palsy, were observed in 5 patients (1.7%). One patient (0.3%) also experienced intracranial hemorrhage (ICH) during hospitalization.

A total of 78 patients (26%) had cardiovascular system involvement. The most common cardiac involvement was pericardial effusion, observed in 20 patients (6.7%). There were 16 instances of reduced ejection fraction (EF). Coronary dilation was observed in 4 patients, and microaneurysms in 1 patient. Additionally, 12 patients (4%) developed cardiogenic shock.

**Table 1. Involvement of body organs in order of frequency in patients with MIS-C.**

| Organ System     | Frequency | Percentage |
|------------------|-----------|------------|
| Hematologic      | 261       | 87%        |
| Gastrointestinal | 255       | 85%        |
| Respiratory      | 201       | 67%        |
| Nephrological    | 152       | 50.6%      |
| Neurological     | 107       | 35.7%      |
| Cardiovascular   | 78        | 26%        |
| Mucocutaneous    | 45        | 15%        |
| Endocrine        | 28        | 9.3%       |
| Musculoskeletal  | 13        | 4.3%       |

<https://doi.org/10.1371/journal.pone.0313843.t001>

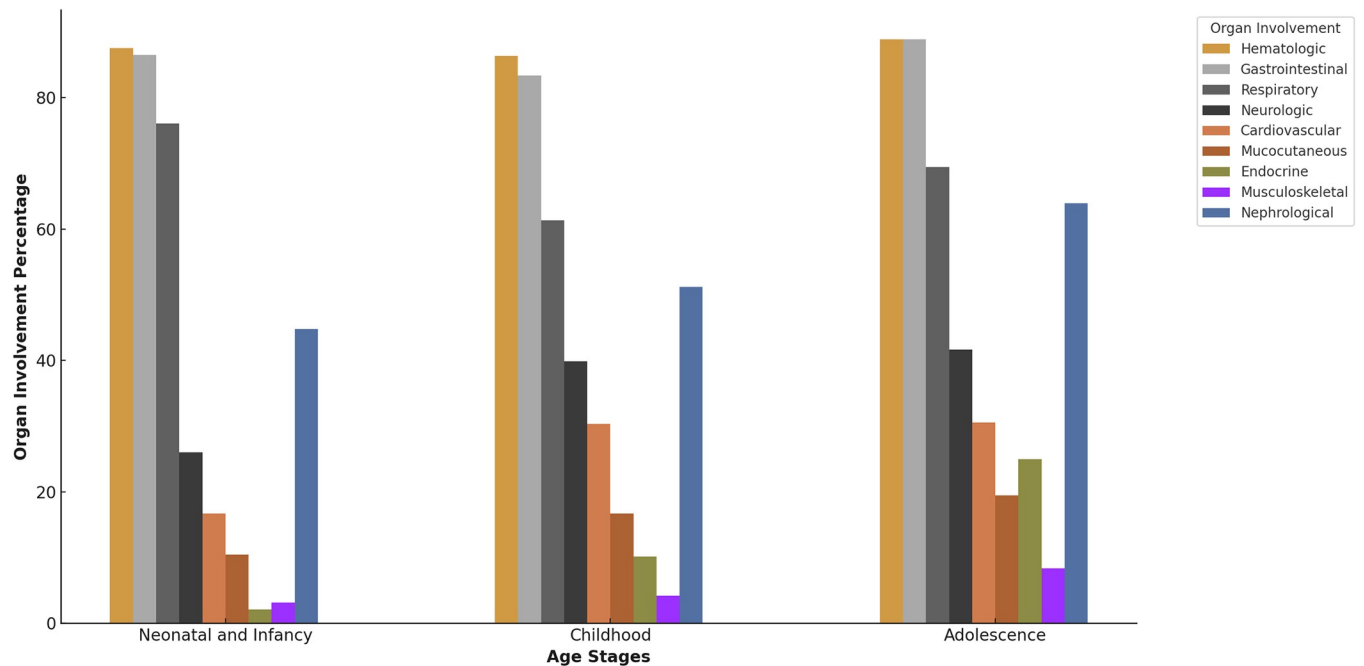

**Fig 1. Organ involvement across age stages in MIS-C.**

<https://doi.org/10.1371/journal.pone.0313843.g001>

Among 28 patients with endocrine system involvement, hyperglycemia was reported in 24 patients (8%), hypoglycemia in 4 patients (1.3%), diabetic ketoacidosis in 7 patients (2.3%), and hypertriglyceridemia in 1 patient (0.3%).

In this study, 45 patients (15%) showed Kawasaki-like features. The most common clinical findings are presented in Table 2 in order of their frequency.

Based on paraclinical findings, 21 patients (7%) had electrolyte disorders, with the most common being hypocalcemia in 8 patients (2.7%).

Abnormal urinalysis was reported for 151 patients (50.3%), among which glucosuria was found in 83 cases (27.7%) and proteinuria in 29 cases (9.7%). Elevated white blood cells were seen in the urine of 39 patients (13%), and red blood cells were found in the urine of 24

**Table 2. The most common clinical signs and symptoms in order of frequency in patients with MIS-C.**

| Symptom                | Frequency | Percentage |
|------------------------|-----------|------------|
| Fever                  | 300       | 100%       |
| Nausea and Vomiting    | 126       | 42%        |
| Cough                  | 109       | 36.3%      |
| Diarrhea               | 83        | 27%        |
| Seizures               | 61        | 20.3%      |
| Shortness of Breath    | 47        | 15.6%      |
| Kawasaki-like Features | 45        | 15%        |
| Reduced Appetite       | 45        | 15%        |
| Respiratory Distress   | 37        | 12.3%      |
| Skin Rash              | 33        | 11%        |
| Conjunctivitis         | 27        | 9%         |
| Headache               | 27        | 9%         |
| Abdominal Pain         | 26        | 8.6%       |

<https://doi.org/10.1371/journal.pone.0313843.t002>

**Table 3. The most common laboratory findings in order of frequency in patients with MIS-C.**

| Finding            | Frequency (out of 300) | Percentage |
|--------------------|------------------------|------------|
| Increased D-dimer  | 250                    | 83.3%      |
| Increased Ferritin | 214                    | 71.3%      |
| Increased Troponin | 198                    | 66%        |
| Increased ESR      | 180                    | 60%        |
| Lymphopenia        | 153                    | 51%        |
| Increased CRP      | 150                    | 50%        |
| Decreased Albumin  | 129                    | 43%        |
| Increased AST      | 129                    | 43%        |
| Anemia             | 123                    | 41%        |
| Glucosuria         | 83                     | 27.7%      |
| Neutrophilia       | 82                     | 27.3%      |
| Thrombocytosis     | 62                     | 20.7%      |
| Increased ALT      | 59                     | 19.7%      |
| Increased LDH      | 46                     | 15.3%      |
| Leukopenia         | 46                     | 15.3%      |
| Leukocytosis       | 39                     | 13%        |
| Sterile Pyuria     | 39                     | 13%        |
| Thrombocytopenia   | 36                     | 12%        |

<https://doi.org/10.1371/journal.pone.0313843.t003>

patients (8%). Furthermore, 42 patients (14%) had abnormal stool tests, with 27 cases showing white blood cells (9%), 13 cases showing red blood cells (4.3%), and 8 cases showing yeast (2.7%) in the stool.

According to [Table 3](#), elevated D-dimer levels were the most common paraclinical finding, with a frequency of 83.3%. This was followed by increased ferritin in 71.4%, elevated troponin in 66%, elevated ESR in 59.7%, lymphopenia in 51%, and increased CRP in 49.7%.

The outcomes of MIS-C at the end of hospitalization are presented in [Table 4](#). The findings show that 81.7% of patients were hospitalized in isolation throughout the duration, and 18.3% required ICU admission. Overall, 1% of the patients died during hospitalization.

Based on findings from [Table 5](#), there is a significant association between cardiovascular involvement and all measured variables, including blood platelet levels, ESR, CRP, serum troponin, ferritin, albumin, and D-dimer levels, each showing a P value  $\leq 0.01$ . Out of 300 patients, 78 patients (26%) had cardiovascular involvement.

## Discussion

Herein, we studied the clinical and laboratory characteristics of 300 patients admitted to our hospital with the confirmed diagnosis of MIS-C. Most of the patients in our study belong to the childhood age group, with 168 individuals (56%). The median age of MIS-C patients in the present study was 3 years, which is close to the median ages reported in studies by Buonsenso

**Table 4. Outcomes of MIS-C at the end of hospitalization.**

| Outcome                   | Frequency | Percentage | Median Duration of Hospitalization (IQR) |
|---------------------------|-----------|------------|------------------------------------------|
| Hospitalized in Isolation | 245       | 81.7%      | 4.41 (2.9–6.5)                           |
| ICU Admission             | 55        | 18.3%      | 4.46 (2.6–7.1)                           |
| Death                     | 3         | 1%         | -                                        |
| Recovery                  | 297       | 99%        | -                                        |

<https://doi.org/10.1371/journal.pone.0313843.t004>

Table 5. Association of paraclinical findings with cardiovascular involvement due to MIS-C.

| Variable |          | Cardiovascular Involvement |                   | P value |
|----------|----------|----------------------------|-------------------|---------|
|          |          | No Frequency (%)           | Yes Frequency (%) |         |
| Platelet | Low      | 20 (9%)                    | 16 (20.5%)        | <0.001  |
|          | Normal   | 172 (77.5%)                | 30 (38.5%)        |         |
|          | High     | 30 (13.5%)                 | 32 (41%)          |         |
|          | Total    | 222 (100%)                 | 78 (100%)         |         |
| ESR      | Normal   | 110 (49.5%)                | 10 (12.8%)        | <0.001  |
|          | High     | 112 (50.4%)                | 68 (87%)          |         |
|          | Total    | 222 (100%)                 | 78 (100%)         |         |
| CRP      | Normal   | 126 (56.7%)                | 24 (30.7%)        | <0.001  |
|          | High     | 96 (43.2%)                 | 54 (69.2%)        |         |
|          | Total    | 222 (100%)                 | 78 (100%)         |         |
| Troponin | Negative | 96 (43.2%)                 | 6 (7.7%)          | <0.001  |
|          | Positive | 126 (56.7%)                | 72 (92.3%)        |         |
|          | Total    | 222 (100%)                 | 78 (100%)         |         |
| D-dimer  | Normal   | 50 (22.5%)                 | 0 (0%)            | <0.001  |
|          | High     | 172 (77.5%)                | 78 (100%)         |         |
|          | Total    | 222 (100%)                 | 78 (100%)         |         |
| Ferritin | Normal   | 49 (22%)                   | 37 (47.4%)        | <0.001  |
|          | High     | 173 (78%)                  | 41 (52.5%)        |         |
|          | Total    | 222 (100%)                 | 78 (100%)         |         |
| Albumin  | Low      | 68 (30.6%)                 | 61 (78.2%)        | <0.001  |
|          | Normal   | 154 (69.4%)                | 17 (21.8%)        |         |
|          | High     | 0 (0%)                     | 0 (0%)            |         |
|          | Total    | 222 (100%)                 | 78 (100%)         |         |

<https://doi.org/10.1371/journal.pone.0313843.t005>

et al. [18], Abdelaziz et al. [19], Rostami-Maskopae et al. [20], Karunakar et al. [21], and Kapoor et al. [22], with median ages of 3.93, 4, 4.5, 5, and 5.5 years, respectively. This is while many studies have also reported a median age of 8 years or older [11,23–26]. The difference in the study population's age range can be one reason for the variation in median age across different studies. Similar to other studies, a higher gender distribution of MIS-C in boys compared to girls was observed in this study as well [11,19–21,23,25,26].

In terms of systemic involvement, hematologic system involvement has been the most prevalent, with a frequency of 87%, making it the most common system affected. Following hematologic involvement, the gastrointestinal, respiratory, nephrologic, neurologic, cardiovascular, mucocutaneous, endocrine, and musculoskeletal systems rank next with frequencies of 85%, 67%, 50.7%, 35.7%, 26%, 15%, 9.3%, and 4.3%, respectively. In a multicenter study by Rostami-Maskopae et al. in Iran, the highest involvement was in the gastrointestinal and hematologic systems, with frequencies of 88.89% and 84.44%, respectively [20]. Similarly, studies conducted in the United States also showed the highest involvement in the gastrointestinal, cardiovascular, and hematologic systems in that order [11,26]. However, a multicenter study by Mehra et al. in India reported that although the gastrointestinal system had the highest involvement at 96%, hematologic involvement was lower than in our study, at 54% [27].

Overall, the involvement of the gastrointestinal, respiratory, and neurologic systems in this study aligns with that of other studies. However, mucocutaneous and cardiovascular involvement is significantly less than in other studies [11,22,26–28]. Additionally, renal system involvement is higher in this study compared to others [20,24,26,27]. Endocrine



manifestations reported in this study include hyperglycemia (8%), hypoglycemia (1.3%), and diabetic ketoacidosis (3.2%), which have not been reported in any epidemiological studies on MIS-C clinical manifestations so far. On the other hand, the study by Saritas Nakip et al. demonstrated that hyperglycemia is prevalent in MIS-C patients [29]. Case reports also mention the occurrence of diabetic ketoacidosis in MIS-C patients [30,31]. The findings of this study regarding the association of MIS-C with the endocrine system can provide valuable insights for physicians in terms of offering necessary therapeutic solutions.

Moreover, the results of our study reveal significant age group-related differences in organ involvement in MIS-C, with consistently high involvement of hematologic and gastrointestinal systems across all age groups. The increased cardiovascular involvement during adolescence compared to the other age groups aligns with the findings of Dufort et al. [32]. Additionally, the marked increase in endocrine involvement during adolescence may be linked to hormonal changes during puberty [33].

Excluding fever, which is a pre-requisite for MIS-C diagnosis, the most prevalent symptoms observed upon presentation include nausea and vomiting (42%), cough (36.3%), diarrhea (27%), seizures (20.3%), shortness of breath (15.6%), decreased appetite (15%), and Kawasaki-like manifestations (15%). In a systematic review by Radia et al., which encompassed 783 MIS-C cases from 35 different studies, vomiting and diarrhea, similar to our research, were among the symptoms with the highest prevalence [34]. However, in contrast to our findings, rashes were the most clinically prevalent symptom with 42% frequency. Additionally, cough was observed in only 4.5% of cases in this study [34]. In the study by Godfred-Cato et al., abdominal pain, vomiting, diarrhea, and rash were the most prevalent clinical symptoms, each with over 50% prevalence. The frequency of cough in this study was 28.6% [26]. While abdominal pain was reported in over 50% of cases in many studies, its prevalence in our study was only 8.6% [24,26,32,35]. In the systematic review by Kaushik et al., Kawasaki-like manifestations were observed in 36% of individuals, more than twice in our study [36].

Echocardiography conducted on 108 individuals (36% of the study population) revealed pericardial effusion, decreased EF, tricuspid valve insufficiency, mitral valve insufficiency, and coronary artery involvement in 18.5%, 14.8%, 14.8%, 13.8%, and 4.6% of cases, respectively. This contrasts with the findings of the study by Rostami-Maskopae et al., where echocardiographic results in 88.1% of patients showed mitral valve insufficiency, tricuspid valve insufficiency, coronary artery dilatation, pericardial effusion, and decreased EF in 88.7%, 64.1%, 31.3%, 32.3%, and 26.6% of patients, respectively [20].

Among the laboratory findings, the highest abnormal values were related to inflammatory markers. Increases in D-dimer, ferritin, troponin, ESR, CRP, LDH, and a decrease in albumin were observed in 3.83%, 4.71%, 7.66%, 7.59%, 7.49%, 5.15%, and 6.43% of cases, respectively. These results were consistent with previous studies, except for CRP, where previous studies reported a higher percentage increase [20,32]. In this study, blood markers including lymphopenia, anemia, neutrophilia, thrombocytosis, leukopenia, leukocytosis, thrombocytopenia, neutropenia, and lymphocytosis were observed in 51%, 41%, 27.3%, 20.7%, 15.3%, 13%, 12%, 8.7%, and 2% of cases, respectively. These results were in line with the findings of a systematic review, where lymphopenia, neutrophilia, and thrombocytopenia were observed in 58%, 22%, and 22% of individuals, respectively [36]. Among the measured liver enzymes, AST increased in 43%, and ALT increased in 19.7% of cases. The increase in these two enzymes was higher in our study compared to the study by Hajiani Ghotbabadi et al. and was approximately consistent with the study by Kiani et al. [37,38].

Urinalysis of 50.3% of MIS-C patients in this study was abnormal, including glucosuria, sterile pyuria, proteinuria, and RBC in urine, observed in 27.7%, 13%, 9.7%, and 8% of cases, respectively. In most epidemiological studies reporting clinical manifestations of MIS-C, there



was no mention of abnormal urinalysis. However, in the study by Ludwikowska et al., leukocyturia and dysuria were observed in 19.4% and 15.6% of cases, respectively [28]. Overall, limited studies have reported glucosuria, sterile pyuria, proteinuria, and RBC in the urine of MIS-C patients [39–41]. The renal involvement and abnormal urinalysis in patients with MIS-C, as also addressed in the study by Meneghel et al., underscores the importance of clinical and laboratory data in the current study [39].

In addition to urinalysis, abnormal stool tests have been recorded in 14% of cases, with the presence of WBC and RBC in the stool being the most common findings at frequencies of 9% and 3.4%, respectively. Apparently, in other epidemiological studies, there have been no reports on the results of stool tests. However, in case report studies, abnormal stool tests have been reported in MIS-C patients [42,43].

Despite the association between inflammatory markers and cardiovascular involvement, their correlation in MIS-C patients with cardiovascular involvement has not been thoroughly investigated [44]. This study found a significant association between cardiovascular involvement and blood platelet levels, ESR, CRP, serum troponin, serum ferritin, D-dimer, and albumin levels. These findings align with previous studies, which have identified cardiovascular disease as a critical biomarker for increased risk and poorer prognosis in COVID-19 patients, highlighting the need to monitor cardiovascular health in infected individuals [5]. Similarly, in the study by Momtazmanesh et al., an increase in the levels of cardiac and inflammatory biomarkers was reported in patients with cardiovascular involvement following COVID-19, which aligns with the current study's findings [45]. In the study by Whittaker et al., unlike the findings of our research, a significant correlation between inflammatory markers and coronary vessel involvement was not reported [46]. Also, in the study by Zhao et al., there was no significant correlation between cardiac involvement in MIS-C patients and elevated troponin levels [47]. Based on the results of the current study, abnormal levels of blood platelets, ESR, CRP, serum troponin, serum ferritin, D-dimer, and albumin serve as risk factors for cardiovascular involvement in patients diagnosed with MIS-C. Therefore, if these risk factors are observed in MIS-C patients, echocardiography is recommended to assess cardiovascular involvement.

Given the complex inflammatory responses in MIS-C, specific cytokines such as IL-1, IL-6, and TNF- $\alpha$  are critical biomarkers for evaluating disease progression and prognosis [48]. Monitoring increased cytokine levels can facilitate the evaluation of the inflammatory condition, aiding in diagnosis and treatment decisions in MIS-C cases. The association of increased pro-inflammatory cytokines with outcomes in pediatric COVID-19-related syndromes enhances the clinical applicability of cytokine profiling among such patients [48]. Although cytokine levels were not measured in this study, a relationship between the putative role of specific cytokines such as IL-1, IL-6, and TNF- $\alpha$  as biomarkers in estimating the course of the disease and prognosis in MIS-C can be related. Subsequent research may expand upon these findings to evaluate the efficacy of cytokine profiling in forecasting cardiovascular outcomes in MIS-C patients.

The examination of the outcomes of MIS-C in this study reveals that 81.7% of the patients were hospitalized in the isolation ward during the entire hospitalization period, and 18.3% of patients needed hospitalization in the ICU. The duration of hospitalization in isolated wards ranged from 1 to 21 days (with a median of 4.41 days), and in the ICU, it varied from 1 to 17 days (with a median of 4.46). Additionally, 1% of the enrolled patients succumbed during hospitalization. In the study by Choe et al. during the pre-delta variant of the SARS-CoV-2 period, 50% of patients required ICU admission [49]. This percentage dropped to 26.3% and 10.6% during the delta and omicron variant periods, respectively [49]. The median hospitalization days in the study by Godfred-Cato et al. were 6 and 5 for hospital and ICU, respectively [26]. Furthermore, the mortality rate in this study was 1.7%, which is close to our study results [26].

Two systematic reviews with data from 655 and 783 individuals reported mortality rates close to ours [34,36]. The mortality rate reported in Iran, according to the Mamishi et al. study, was 1.6%, which is similar to our findings, whereas Rostami-Maskopae et al. reported a rate of 4.44% [20,50]. Given the varying disease severity of different SARS-CoV-2 strains, the outcomes of MIS-C may differ across studies due to differences in data collection times. Additionally, the size of the studied population plays a crucial role in accurately determining disease outcomes.

Our study had notable limitations that should be acknowledged. The first limitation is associated with potential inadequacies in medical records. These inadequacies may arise from the challenges inherent in documenting accurate medical histories, particularly in very young patients who may have limited prior medical documentation or are unable to communicate their symptoms effectively. Moreover, the socioeconomic background of patients and potential biases from diagnosing clinicians could also contribute to incomplete or biased data. The second limitation is the lack of additional investigations, including echocardiography, in a subset of patients. The reasons for this include the absence of confirmation of the final diagnosis or patient discharge with personal consent before the scheduled time. Furthermore, the inherent limitation in studying pediatric populations is the difficulty in ensuring that the children's voices are heard and considered in both medical and research contexts. Often, children are represented by others who speak on their behalf, which can lead to a lack of firsthand input from the patients themselves regarding their experiences and symptoms.

## Conclusion

We have presented an experience with distinct clinical and laboratory manifestations in MIS-C. The median age of MIS-C patients in this study was 3 years, and the disease was more predominant in boys. Given the lower median age in this study compared to previous studies, reporting clinical and laboratory manifestations of MIS-C in pediatrics with a younger age is valuable for the diagnosis and treatment course. The hematologic, gastrointestinal, and respiratory systems are the most commonly involved systems in this disease. Endocrine manifestations, including hyperglycemia and diabetic ketoacidosis, were also observed in MIS-C patients. Renal involvement and abnormal urinalysis were significantly prevalent in MIS-C patients and should receive more attention. Nausea and vomiting, cough, diarrhea, seizures, shortness of breath, decreased appetite, and Kawasaki-like symptoms were the most common clinical symptoms in patients. Elevated D-dimer, ferritin, troponin, ESR, and lymphopenia were the most common laboratory findings in MIS-C. Disturbances in liver enzymes, especially AST, were also evident. Platelet disorders and abnormal levels of ESR, CRP, serum troponin, serum ferritin, D-dimer, and albumin were risk factors for cardiovascular involvement, and consequently, echocardiography is recommended in MIS-C patients with these laboratory indications. Out of 300 hospitalized patients in this study, 18.3% required admission to the ICU, and the mortality rate was 1%. Since the emergence of MIS-C, physicians have faced challenges in various manifestations of MIS-C that can lead to misdiagnosis. Due to the unique clinical manifestations of MIS-C involving multiple systems and the difficulty in obtaining an accurate epidemiological history, the diagnosis of MIS-C requires special attention. Given the lack of a specific diagnostic test for this emerging disease, studies focusing on the investigation of clinical symptoms and findings are valuable.

## Supporting information

**S1 Table. Definitions and observed findings of organ involvement in MIS-C patients.**  
(DOCX)

**S1 File. Raw data of the study.**  
(XLSX)

## Acknowledgments

The authors would like to express their gratitude to the staff of the Children Growth Research Center at Qazvin University of Medical Sciences for their invaluable support and assistance.

## Author Contributions

**Conceptualization:** Mina Farshidgozar.

**Data curation:** Fatemeh Fawzi, Faezeh Maleki Sanjani.

**Formal analysis:** Sonia Oveisi, Alireza Razzaghi.

**Investigation:** Mina Farshidgozar, Fatemeh Fawzi, Hossein Teimouri.

**Methodology:** Sonia Oveisi, Alireza Razzaghi.

**Project administration:** Mina Farshidgozar.

**Software:** Sonia Oveisi, Alireza Razzaghi.

**Supervision:** Mina Farshidgozar.

**Validation:** Mina Farshidgozar, Samira Dodangeh.

**Visualization:** Samira Dodangeh, Hossein Teimouri.

**Writing – original draft:** Mina Farshidgozar, Samira Dodangeh, Hossein Teimouri.

**Writing – review & editing:** Sonia Oveisi, Samira Dodangeh, Hossein Teimouri, Gerson Nakazato.

## References

1. Diseases KSol. Korean Society of Pediatric Infectious Diseases; Korean Society of Epidemiology; Korean Society for Antimicrobial Therapy; Korean Society for Healthcare-associated Infection Control and Prevention; Korea Centers for Disease Control and Prevention. Report on the epidemiological features of coronavirus disease 2019 (COVID-19) outbreak in the Republic of Korea from January 19 to March 2, 2020. *J Korean Med Sci.* 2020; 35(10):e112. <https://doi.org/10.3346/jkms.2020.35.e112> PMID: 32174069
2. Zhu N, Zhang D, Wang W, Li X, Yang B, Song J, et al. A novel coronavirus from patients with pneumonia in China, 2019. *New England journal of medicine.* 2020; 382(8):727–33. <https://doi.org/10.1056/NEJMoa2001017> PMID: 31978945
3. Lai C-C, Shih T-P, Ko W-C, Tang H-J, Hsueh P-R. Severe acute respiratory syndrome coronavirus 2 (SARS-CoV-2) and coronavirus disease-2019 (COVID-19): The epidemic and the challenges. *International journal of antimicrobial agents.* 2020; 55(3):105924. <https://doi.org/10.1016/j.ijantimicag.2020.105924> PMID: 32081636
4. Huang C, Wang Y, Li X, Ren L, Zhao J, Hu Y, et al. Clinical features of patients infected with 2019 novel coronavirus in Wuhan, China. *The lancet.* 2020; 395(10223):497–506.
5. Ielapi N, Licastro N, Provenzano M, Andreucci M, Franciscis Sd, Serra R. Cardiovascular disease as a biomarker for an increased risk of COVID-19 infection and related poor prognosis. *Taylor & Francis;* 2020. p. 713–6. <https://doi.org/10.2217/bmm-2020-0201> PMID: 32426991
6. Liu BM, Hill HR. Role of host immune and inflammatory responses in COVID-19 cases with underlying primary immunodeficiency: a review. *Journal of Interferon & Cytokine Research.* 2020; 40(12):549–54.
7. Buonsenso D, Munblit D, De Rose C, Sinatti D, Ricchiuto A, Carfi A, et al. Preliminary evidence on long COVID in children. *Acta Paediatrica (Oslo, Norway: 1992).* 2021; 110(7):2208. <https://doi.org/10.1111/apa.15870> PMID: 33835507

8. Riphagen S, Gomez X, Gonzalez-Martinez C, Wilkinson N, Theocharis P. Hyperinflammatory shock in children during COVID-19 pandemic. *The Lancet*. 2020; 395(10237):1607–8. [https://doi.org/10.1016/S0140-6736\(20\)31094-1](https://doi.org/10.1016/S0140-6736(20)31094-1) PMID: 32386565
9. Kwak JH, Lee S-Y, Choi J-W. Clinical features, diagnosis, and outcomes of multisystem inflammatory syndrome in children associated with coronavirus disease 2019. *Clinical and experimental pediatrics*. 2021; 64(2):68. <https://doi.org/10.3345/cep.2020.01900> PMID: 33445833
10. Bhat CS, Gupta L, Balasubramanian S, Singh S, Ramanan AV. Hyperinflammatory syndrome in children associated with COVID-19: need for awareness. *Indian pediatrics*. 2020; 57:929–35. <https://doi.org/10.1007/s13312-020-1997-1> PMID: 32683336
11. Feldstein LR, Rose EB, Horwitz SM, Collins JP, Newhams MM, Son MBF, et al. Multisystem inflammatory syndrome in US children and adolescents. *New England Journal of Medicine*. 2020; 383(4):334–46.
12. Son MBF, Friedman K. COVID-19: Multisystem inflammatory syndrome in children (MIS-C) clinical features, evaluation, and diagnosis. Up to Date. 2021.
13. Feldstein LR, Tenforde MW, Friedman KG, Newhams M, Rose EB, Dapul H, et al. Characteristics and outcomes of US children and adolescents with multisystem inflammatory syndrome in children (MIS-C) compared with severe acute COVID-19. *Jama*. 2021; 325(11):1074–87. <https://doi.org/10.1001/jama.2021.2091> PMID: 33625505
14. Organization WH. Multisystem inflammatory syndrome in children and adolescents with COVID-19: scientific brief, 15 May 2020. World Health Organization; 2020.
15. Consiglio CR, Cotugno N, Sardh F, Pou C, Amodio D, Rodriguez L, et al. The immunology of multisystem inflammatory syndrome in children with COVID-19. *Cell*. 2020; 183(4):968–81. e7. <https://doi.org/10.1016/j.cell.2020.09.016> PMID: 32966765
16. Ahmed M, Advani S, Moreira A, Zoretic S, Martinez J, Chorath K, et al. Multisystem inflammatory syndrome in children: a systematic review. *EClinicalMedicine*. 2020; 26. <https://doi.org/10.1016/j.eclinm.2020.100527> PMID: 32923992
17. García-Salido A, de Carlos Vicente JC, Belda Hofheinz S, Balcells Ramírez J, Slöcker Barrio M, Leó Gordillo I, et al. Severe manifestations of SARS-CoV-2 in children and adolescents: from COVID-19 pneumonia to multisystem inflammatory syndrome: a multicentre study in pediatric intensive care units in Spain. *Critical Care*. 2020; 24(1):1–13.
18. Buonsenso D, Mariani F, Pierrì L, Morello R, Yock-Corrales A, Del Aguila O, et al. Association between coagulation profile and clinical outcome in children with SARS-CoV-2 infection or MIS-C: A multicenter cross-sectional study. *Children*. 2022; 9(2):279. <https://doi.org/10.3390/children9020279> PMID: 35204999
19. Abdelaziz TA, Abdulrahman DA, Baz EG, Allam RM, Hamed DE, Elsayed AE, et al. Clinical and laboratory characteristics of multisystem inflammatory syndrome in children associated with COVID-19 in Egypt: a tertiary care hospital experience. *Journal of Paediatrics and Child Health*. 2023; 59(3):445–52. <https://doi.org/10.1111/jpc.16311> PMID: 36580085
20. Rostami-Maskopae F, Ladomenou F, Razavi-Amoli S-K, Navaeifar MR, Hajjalibeig A, Shahbaznejad L, et al. Clinical characteristics and outcomes of the multisystem inflammatory syndrome in children (MIS-C) following COVID-19 infection in Iran: A multicenter study. *PLoS One*. 2022; 17(9):e0274104. <https://doi.org/10.1371/journal.pone.0274104> PMID: 36137147
21. Karunakar P, Ramamoorthy JG, Anantharaj A, Parameswaran N, Biswal N, Dhodapkar R, et al. Clinical profile and outcomes of multisystem inflammatory syndrome in children (MIS-C): Hospital-based prospective observational study from a tertiary care hospital in South India. *Journal of Paediatrics and Child Health*. 2022; 58(11):1964–71. <https://doi.org/10.1111/jpc.16129> PMID: 35869845
22. Kapoor R, Chandra T, Singh CP, Singh R, Pandey I. Multisystem inflammatory syndrome in children (MIS-C) related to SARS-CoV-2 and 1-year follow-up. *Indian Journal of Pediatrics*. 2023; 90(10):1008–12. <https://doi.org/10.1007/s12098-022-04385-9> PMID: 36482236
23. Lampidi S, Maritsi D, Charakida M, Eleftheriou I, Farmaki E, Spyridis N, et al. Multisystem inflammatory syndrome in children (MIS-C): A nationwide collaborative study in the Greek population. *European Journal of Pediatrics*. 2024:1–10. <https://doi.org/10.1007/s00431-023-05383-5> PMID: 38214810
24. Savas Sen Z, Tanir G, Gumuser Cinni R, Uysal Yazici M, Yoldas T, Ozturk Z, et al. Multisystem inflammatory syndrome in children during severe acute respiratory syndrome coronavirus-2 pandemic in Turkey: A single-centre experience. *Journal of paediatrics and child health*. 2022; 58(1):129–35. <https://doi.org/10.1111/jpc.15674> PMID: 34343373
25. García-Salido A, de Carlos Vicente JC, Belda Hofheinz S, Balcells Ramírez J, Slöcker Barrio M, Leó Gordillo I, et al. Severe manifestations of SARS-CoV-2 in children and adolescents: from COVID-19 pneumonia to multisystem inflammatory syndrome: a multicentre study in pediatric intensive care units in Spain. *Critical Care*. 2020; 24:1–13.

26. Godfred-Cato S. COVID-19-associated multisystem inflammatory syndrome in children—United States, March–July 2020. *MMWR Morbidity and Mortality Weekly Report*. 2020;69. <https://doi.org/10.15585/mmwr.mm6932e2> PMID: 32790663
27. Mehra B, Pandey M, Gupta D, Oberoi T, Jerath N, Sharma R, et al. COVID-19-associated multisystem inflammatory syndrome in children: a multicentric retrospective cohort study. *Indian Journal of Critical Care Medicine: Peer-reviewed, Official Publication of Indian Society of Critical Care Medicine*. 2021; 25(10):1176. <https://doi.org/10.5005/jp-journals-10071-23996> PMID: 34916752
28. Ludwikowska KM, Okarska-Napierała M, Dudek N, Trzeciński P, Kusa J, Piwoński KP, et al. Distinct characteristics of multisystem inflammatory syndrome in children in Poland. *Scientific reports*. 2021; 11(1):23562. <https://doi.org/10.1038/s41598-021-02669-2> PMID: 34876594
29. Nakip OS, Kesici S, Bozkurt BS, Ozsurekci Y, Demirbilek H, Bayrakci B. Incidence and Risk Factors of Hyperglycemia in Severe Multisystem Inflammatory Syndrome in Children: A Retrospective Case-Control Study. *Journal of Pediatric Infectious Diseases*. 2023; 18(01):031–7.
30. Naguib MN, Raymond JK, Vidmar AP. New onset diabetes with diabetic ketoacidosis in a child with multisystem inflammatory syndrome due to COVID-19. *Journal of Pediatric Endocrinology and Metabolism*. 2021; 34(1):147–50. <https://doi.org/10.1515/jpem-2020-0426> PMID: 33180050
31. Dye AM, Arnold SR, Finkel TH, Kim A. A Case of Severe MIS-C in Pediatric Diabetes: Complications of COVID-19. *Journal of the Endocrine Society*. 2021; 5(Supplement\_1):A692–A3.
32. Dufort EM, Koumans EH, Chow EJ, Rosenthal EM, Muse A, Rowlands J, et al. Multisystem inflammatory syndrome in children in New York State. *New England Journal of Medicine*. 2020; 383(4):347–58.
33. Aslam S. Endocrine events involved in puberty: A revisit to existing knowledge. *Life and Science*. 2020;1(1):12-.
34. Radia T, Williams N, Agrawal P, Harman K, Weale J, Cook J, et al. Multi-system inflammatory syndrome in children & adolescents (MIS-C): A systematic review of clinical features and presentation. *Paediatric respiratory reviews*. 2021; 38:51–7.
35. Mamishi S, Movahedi Z, Mohammadi M, Ziaee V, Khodabandeh M, Abdolsalehi MR, et al. Multisystem inflammatory syndrome associated with SARS-CoV-2 infection in 45 children: a first report from Iran. *Epidemiology & Infection*. 2020; 148:e196. <https://doi.org/10.1017/S095026882000196X> PMID: 32854812
36. Kaushik A, Gupta S, Sood M, Sharma S, Verma S. A systematic review of multisystem inflammatory syndrome in children associated with SARS-CoV-2 infection. *The Pediatric infectious disease journal*. 2020; 39(11):e340–e6. <https://doi.org/10.1097/INF.0000000000002888> PMID: 32925547
37. Ghotbabadi SH, Mollaie M, Hamzavi SS, Dashti AS. Clinical and laboratory characteristics of the multisystem inflammatory syndrome in children: a case series of 75 patients. *Archives of Pediatric Infectious Diseases*. 2022; 10(4).
38. Kiani M, Mohammadpour-Mir A, Sorkhi H, Esmaeili-Dooki M, Nikpour M, Babazadeh K, et al. Multi-organ presentation of children with COVID-19 infection in the north of Iran: a retrospective study. *International Journal of Pediatrics*. 2021; 9(4):1341–9.
39. Meneghel A, Masenello V, Alfieri F, Giampetruzzi S, Sembenini C, Martini G, et al. Renal Involvement in Multisystem Inflammatory Syndrome in Children: Not Only Acute Kidney Injury. *Children*. 2023; 10(10):1661. <https://doi.org/10.3390/children10101661> PMID: 37892324
40. Raina R, Mawby I, Chakraborty R, Sethi SK, Mathur K, Mahesh S, et al. Acute kidney injury in COVID-19 pediatric patients in North America: Analysis of the virtual pediatric systems data. *PLoS One*. 2022; 17(4):e0266737. <https://doi.org/10.1371/journal.pone.0266737> PMID: 35472149
41. Požgaj Šepec M, Rode M, La Grasta Sabolić L, Stipančić G. New onset diabetes in a boy with multi-system inflammatory syndrome in children (MIS-C) following SARS-CoV-2 infection. *Pediatric Diabetes*. 2021:53-.
42. Bedi N, Kaur J, Sadadiwala S, Gupta N, Abrol P. Non-COVID infections causing MIS-C in COVID recovered children: An association or co-illness—A case series. *Journal of Family Medicine and Primary Care*. 2022; 11(10):6586–9. [https://doi.org/10.4103/jfmpc.jfmpc\\_257\\_22](https://doi.org/10.4103/jfmpc.jfmpc_257_22) PMID: 36618199
43. Sweeny KF, Zhang YJ, Crume B, Martz CA, Blessing MM, Kahn SA. Inflammatory bowel disease presenting with concurrent COVID-19 multisystem inflammatory syndrome. *Pediatrics*. 2021; 147(4). <https://doi.org/10.1542/peds.2020-027763> PMID: 33414238
44. Patoulias D, Stavropoulos K, Imprialos K, Athyros V, Grassos H, Dourmas M, et al. Inflammatory markers in cardiovascular disease; lessons learned and future perspectives. *Current vascular pharmacology*. 2021; 19(3):323–42. <https://doi.org/10.2174/1570161118666200318104434> PMID: 32188386
45. Momtazmanesh S, Shobeiri P, Hanaei S, Mahmoud-Elsayed H, Dalvi B, Malakan Rad E. Cardiovascular disease in COVID-19: a systematic review and meta-analysis of 10,898 patients and proposal of a

- triage risk stratification tool. *The Egyptian Heart Journal*. 2020; 72:1–17. <https://doi.org/10.1186/s43044-020-00075-z> PMID: 32661796
46. Whittaker E, Bamford A, Kenny J, Kaforou M, Jones CE, Shah P, et al. Clinical characteristics of 58 children with a pediatric inflammatory multisystem syndrome temporally associated with SARS-CoV-2. *Jama*. 2020; 324(3):259–69. <https://doi.org/10.1001/jama.2020.10369> PMID: 32511692
  47. Zhao Y, Patel J, Huang Y, Yin L, Tang L. Cardiac markers of multisystem inflammatory syndrome in children (MIS-C) in COVID-19 patients: A meta-analysis. *The American Journal of Emergency Medicine*. 2021; 49:62–70. <https://doi.org/10.1016/j.ajem.2021.05.044> PMID: 34082189
  48. Liu BM, Martins TB, Peterson LK, Hill HR. Clinical significance of measuring serum cytokine levels as inflammatory biomarkers in adult and pediatric COVID-19 cases: A review. *Cytokine*. 2021; 142:155478. <https://doi.org/10.1016/j.cyto.2021.155478> PMID: 33667962
  49. Choe YJ, Choi EH, Choi JW, Eun BW, Eun LY, Kim Y-J, et al. Change in severity and clinical manifestation of MIS-C over SARS-CoV-2 variant outbreaks in Korea. *Journal of Korean medical science*. 2023;38(30).
  50. Mamishi S, Olfat M, Pourakbari B, Eshaghi H, Abdolsalehi MR, Shahbabaie MA, et al. Multisystem inflammatory syndrome associated with SARS-CoV-2 infection in children: update and new insights from the second report of an Iranian referral hospital. *Epidemiology & Infection*. 2022; 150:e179.
